# Supplementary material for: Rh(iii)-catalyzed [4+1] annulation of a sulfoxonium ylide with allyl alkyl ethers: a detailed theoretical study of the anti-inflammatory and antidiabetic activities with DFT
Source: Royal Society of Chemistry journal article supplement (doi:10.1039/d4nj03140g), 2024-01-01
Supplement: d4nj03140g1.pdf [file d4nj03140g1.pdf]

**Supplementary Information**

**Rh(III) catalyzed C–H activation of 4+1 annulation of sulfoxonium ylide with  
Allyl Alkyl Ether: Detailed theoretical study of DFT and towards the anti-  
inflammatory and antidiabetic activity**

**Pakkirisamy Sivakumar<sup>a,f</sup>, Pothapragada S. K. Prabhakar Ganesh<sup>b</sup>, Perumal Muthuraja<sup>c,e</sup>,  
Sarangapani Bharanidharan<sup>d</sup>, Balasubramaniyan Anandhan<sup>a</sup>, Rajaram Rajamohan<sup>e\*</sup>,  
Subramaniyan Kamatchi<sup>f\*</sup>**

<sup>a</sup> Department of Chemistry, Saraswathy College of Engineering and Technology, Olakkur, Tindivanam- 604 305, Tamil Nadu, India.

<sup>b</sup> Department of Chemistry, Indian Institute of Science Education and Research (IISER) Tirupati, Tirupati - 517 507, Andhra Pradesh, India.

<sup>c</sup> Department of Chemistry, Indian Institute of Technology Guwahati, Guwahati - 781 039, Assam, India.

<sup>d</sup> Department of Physics, Panimalar Engineering College, Chennai - 600 123, Tamil Nadu, India.

<sup>e</sup> Organic Materials Synthesis Laboratory, School of Chemical Engineering, Yeungnam University, Gyeongsan 38541, Republic of Korea.

<sup>f</sup> PG & Research Department of Chemistry, Government Arts College, Chidambaram - 608 102, Tamil Nadu, India.

E-mail: [rajmohanau@yu.ac.kr](mailto:rajmohanau@yu.ac.kr) (R.R); [drskgaccdmchem@gmail.com](mailto:drskgaccdmchem@gmail.com) (S.K)

## 1.0 General remarks

All experiments were carried out in the open air unless stated otherwise. Merck precoated silica gel plates (Art. 5554) treated with a fluorescent indicator were used for analytical thin layer chromatography (TLC). Column chromatography was performed using silica gel 9385 (Merck). Melting points are uncorrected and were determined using the Fisher-Johns Melting Point Apparatus.  $^1\text{H}$  NMR (400 MHz),  $^{19}\text{F}$  NMR (376 MHz), and  $^{13}\text{C}$  NMR (100 MHz) spectra were recorded on the Bruker AVANCE NEO 400 MHz spectrometer. The NMR spectra were recorded in  $\text{CDCl}_3$  using  $\delta = 7.26$  for  $^1\text{H}$  NMR and 77.16 for  $^{13}\text{C}$  NMR, ppm as the residual solvent chemical shifts. The NMR spectra were recorded in  $\text{DMSO}-d_6$  using  $\delta = 2.50$  and 39.520 ppm as the residual solvent chemical shifts. All chemical shifts ( $\delta$ ) are expressed in units of ppm and  $J$  values are given in Hz. Multiplicities are abbreviated as follows: s = singlet, d = doublet, t = triplet, q = quartet, m = multiplet or overlap of nonequivalent resonances, and dd = doublet of doublets. Melting points were measured with a Fisher Johns melting point apparatus and uncorrected. Infrared (IR) spectra were recorded on a PerkinElmer Spectrum Two<sup>TM</sup> IR spectrometer with frequencies expressed in  $\text{cm}^{-1}$ , and high-resolution mass spectra (HRMS) were obtained from Orbitrap Elite HybridIon Trap-Orbitrap (ThermoFischer scientific, Newington, NH, USA) Mass Spectrometer in electrospray ionization mode (ESI+) and Agilent Bio-QTOF-6545 high-resolution ion mass spectrometer in electrospray ionization mode (ESI+).

The synthesized sulfoxonium ylides (**1a**), and corresponding allyl alkyl ether (**2a-2c**), styrene (**2e**), and 1-(allyloxy)-4-bromobenzene (**2f**) are commercially available from the TCI and Sigma Aldrich chemicals.

**Table S1.** Commercially available allyl alkyl ether and synthesis of sulfoxonium ylide

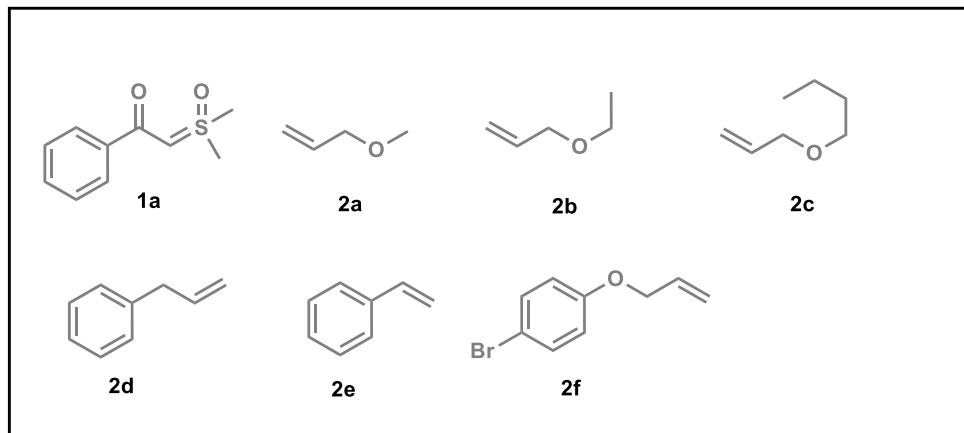

## 2.0 General procedure for the synthesis of 1,3,4-oxadiazole derivatives (**3a**)

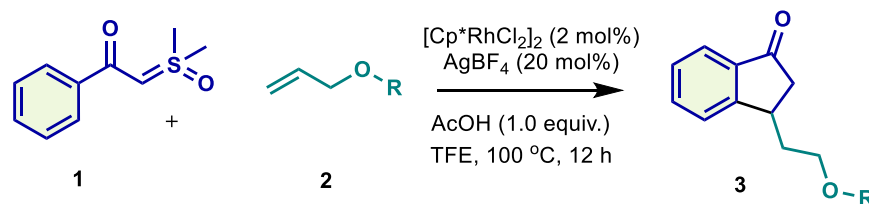

Phenyl sulfoxonium ylide **1a** (59mg, 0.30 mmol), allyl alkyl ether **2** (0.45 mmol), and  $[\text{Cp}^*\text{RhCl}_2]_2$  (3.8 mg, 0.006 mmol),  $\text{AgBF}_4$  (11.7 mg, 0.06 mmol) and AcOH (18 mg, 0.3 mmol) dissolved in 2. mL of TFE were combined in a shielded 10 mL vial. This mixture was subjected to a temperature of 100 °C for 12 h. Upon completion, the reaction mixture underwent TLC analysis. Subsequently, the mixture was cooled to room temperature, filtered and the crude was evaporated through rota evaporator and dried under high vacuum. The crude product obtained underwent purification *via* column chromatography, yielding **3a** in 77% (44 mg)

### 3.0 Characterization data of $^1\text{H}$ , $^{13}\text{C}$ NMR 3a-3c

#### 3-(2-Methoxyethyl)-2,3-dihydro-1H-inden-1-one (3a)

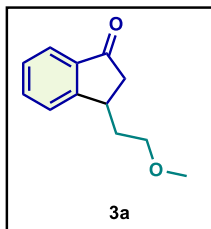

**Yield** (0.3 mmol scale, 44 mg, 77%); yellow oil; (hexane/ethyl acetate = 8:2, v/v); **FT-IR:** 2875, 1710, 1313, 1256, 953, 723;  **$^1\text{H}$  NMR** (600 MHz, Chloroform-*d*)  $\delta$  7.73 (d,  $J = 7.8$  Hz, 1H), 7.59 (t,  $J = 7.8$  Hz, 1H), 7.50 (d,  $J = 7.8$  Hz, 1H), 7.37 (t,  $J = 7.8$  Hz, 1H), 3.52 – 3.49 (m, 2H), 3.47 – 3.43 (m, 1H), 3.35 (s, 3H), 2.87 (dd,  $J = 19.2, 7.8$  Hz, 1H), 2.42 (dd,  $J = 19.2, 3.6$  Hz, 1H), 2.24 – 2.18 (m, 1H), 1.73 – 1.69 (m, 1H);  **$^{13}\text{C}$  NMR** (150 MHz, Chloroform-*d*)  $\delta$  206.3, 158.5, 136.8, 134.8, 127.7, 125.7, 123.6, 70.9, 58.8, 43.2, 36.0, 35.4; **HR-MS** (ESI)  $m/z$  calcd for  $\text{C}_{12}\text{H}_{15}\text{O}_2$  [ $\text{M}+\text{H}^+$ ] 191.1067, found 191.1067.

#### 3-(2-Ethoxyethyl)-2,3-dihydro-1H-inden-1-one (3b)

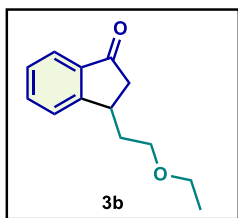

**Yield** (0.3 mmol scale, 43 mg, 70%); yellow oil; (hexane/ethyl acetate = 8:2, v/v); **FT-IR:** 2888, 1703, 1312, 1253, 946, 727;  **$^1\text{H}$  NMR** (600 MHz, Chloroform-*d*)  $\delta$  7.73 (d,  $J = 7.8$  Hz, 1H), 7.60 (td,  $J = 7.8, 1.2$  Hz, 1H), 7.51 (d,  $J = 7.8$  Hz, 1H), 7.37 (t,  $J = 7.8$  Hz, 1H), 3.57 – 3.44 (m, 5H), 2.87 (dd,  $J = 19.2, 7.8$  Hz, 1H), 2.45 (dd,  $J = 19.2, 3.6$  Hz, 1H), 2.25 – 2.19 (m, 1H), 1.76 – 1.70 (m, 1H), 1.20 (t,  $J = 7.0$  Hz, 3H);  **$^{13}\text{C}$  NMR** (150 MHz, Chloroform-*d*)  $\delta$  206.4, 158.6, 136.8, 134.7, 127.6, 125.8, 123.6, 68.7, 66.5, 43.3, 36.1, 35.6, 15.3; **HR-MS** (ESI)  $m/z$  calcd for  $\text{C}_{13}\text{H}_{17}\text{O}_2$  [ $\text{M}+\text{H}^+$ ] 205.1223, found 205.1223

#### 3-(2-Butoxyethyl)-2,3-dihydro-1H-inden-1-one (3c)

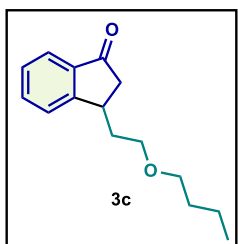

**Yield** (0.3 mmol scale, 58 mg, 73%); yellow oil; (hexane/ethyl acetate = 8:2, v/v); **FT-IR:** 2888, 1703, 1312, 1253, 946, 727;  **$^1\text{H}$  NMR** (500 MHz,  $\text{CDCl}_3$ )  $\delta$  7.25 (d,  $J = 8.0$  Hz, 1H), 7.13 (t,  $J = 7.7$  Hz, 1H), 7.04 (d,  $J = 7.5$  Hz, 1H), 6.90 (d,  $J = 7.5$  Hz, 1H), 3.76 – 3.50 (m, 1H), 3.10 – 2.89 (m, 3H), 2.65 – 2.37 (m, 3H), 2.01 – 1.93 (m, 1H), 1.80 – 1.66 (m, 1H), 1.17 – 1.04 (m, 2H), 0.95 – 0.85 (m, 2H), 0.44 (td,  $J = 7.3, 1.5$  Hz, 3H);  **$^{13}\text{C}$  NMR** (126 MHz,  $\text{CDCl}_3$ )  $\delta$  207.0, 159.0, 137.0, 135.1, 127.9, 126.0, 124.0, 71.3, 69.2, 43.5, 36.3, 35.9, 32.1, 19.7, 14.3; **HR-MS** (ESI)  $m/z$  calcd for  $\text{C}_{15}\text{H}_{21}\text{O}_2$  [ $\text{M}+\text{H}^+$ ] 233.1536, found 233.1536.

### 3-Phenethyl-2,3-dihydro-1H-inden-1-one (3d)

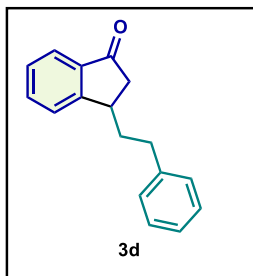

**Yield** (0.3 mmol scale, 30 mg, 42%); yellow oil; (hexane/ethyl acetate = 8:2, v/v); **<sup>1</sup>H NMR** (500 MHz, CDCl<sub>3</sub>)  $\delta$  7.75 (d,  $J$  = 7.9 Hz, 1H), 7.60 (t,  $J$  = 7.6 Hz, 1H), 7.51 (d,  $J$  = 7.6 Hz, 1H), 7.38 (d,  $J$  = 14.7 Hz, 2H), 7.31 (d,  $J$  = 7.6 Hz, 2H), 7.21 (s, 3H), 3.40 (d,  $J$  = 10.3 Hz, 1H), 2.94 – 2.88 (m, 1H), 2.73 (d,  $J$  = 5.3 Hz, 2H), 2.44 (d,  $J$  = 15.5 Hz, 1H), 2.28 (ddt,  $J$  = 10.2, 6.6, 3.5 Hz, 1H), 1.83 (dd,  $J$  = 9.4, 4.8 Hz, 1H). **<sup>13</sup>C NMR** (126 MHz, CDCl<sub>3</sub>)  $\delta$

206.2, 158.6, 141.5, 136.9, 134.8, 128.6, 128.5, 127.7, 126.2, 125.6, 123.7, 43.1, 37.9, 37.9, 34.0.

**HR-MS** (ESI)  $m/z$  calcd for C<sub>17</sub>H<sub>17</sub>O [M+H<sup>+</sup>] 237.1274, found 233.1269.

## 4.0 Spectrum of $^1\text{H}$ , $^{13}\text{C}$ NMR and HRMS 3a-3d

PM-20.1.1.1r

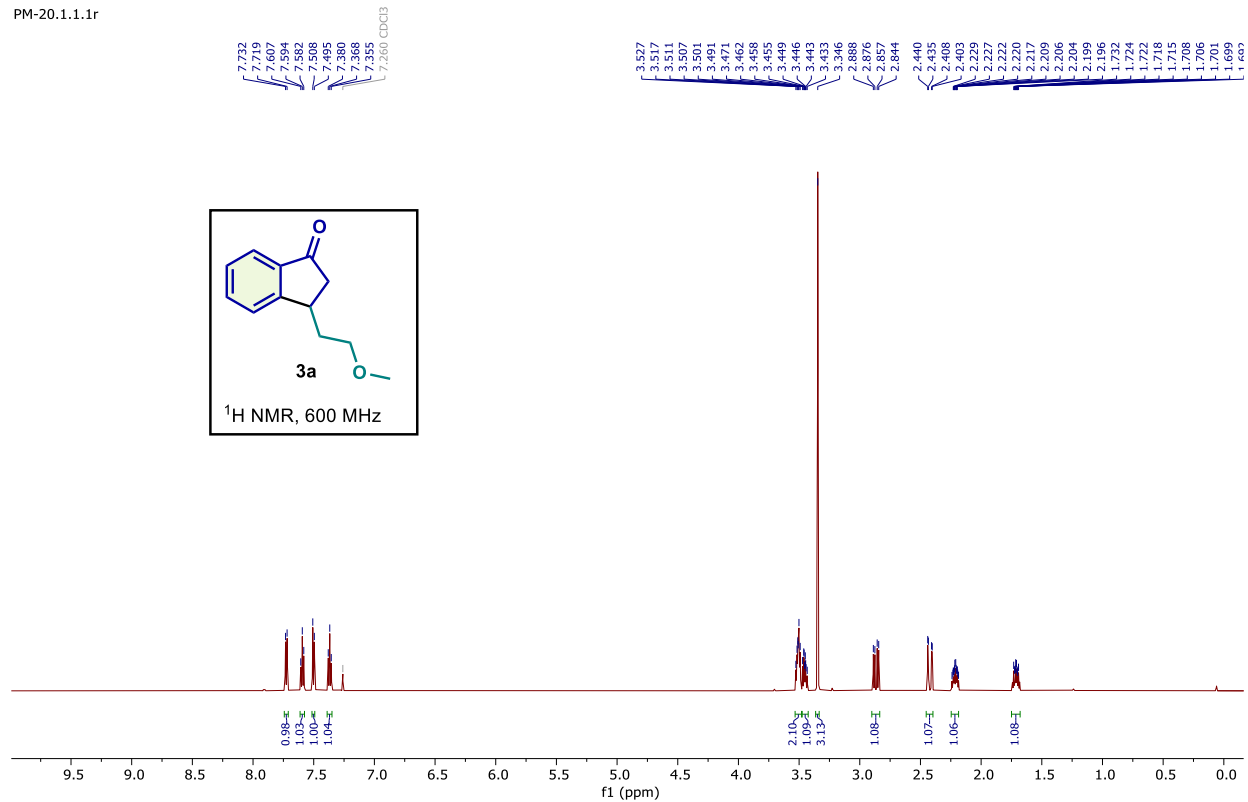

PM-20.2.1.1r

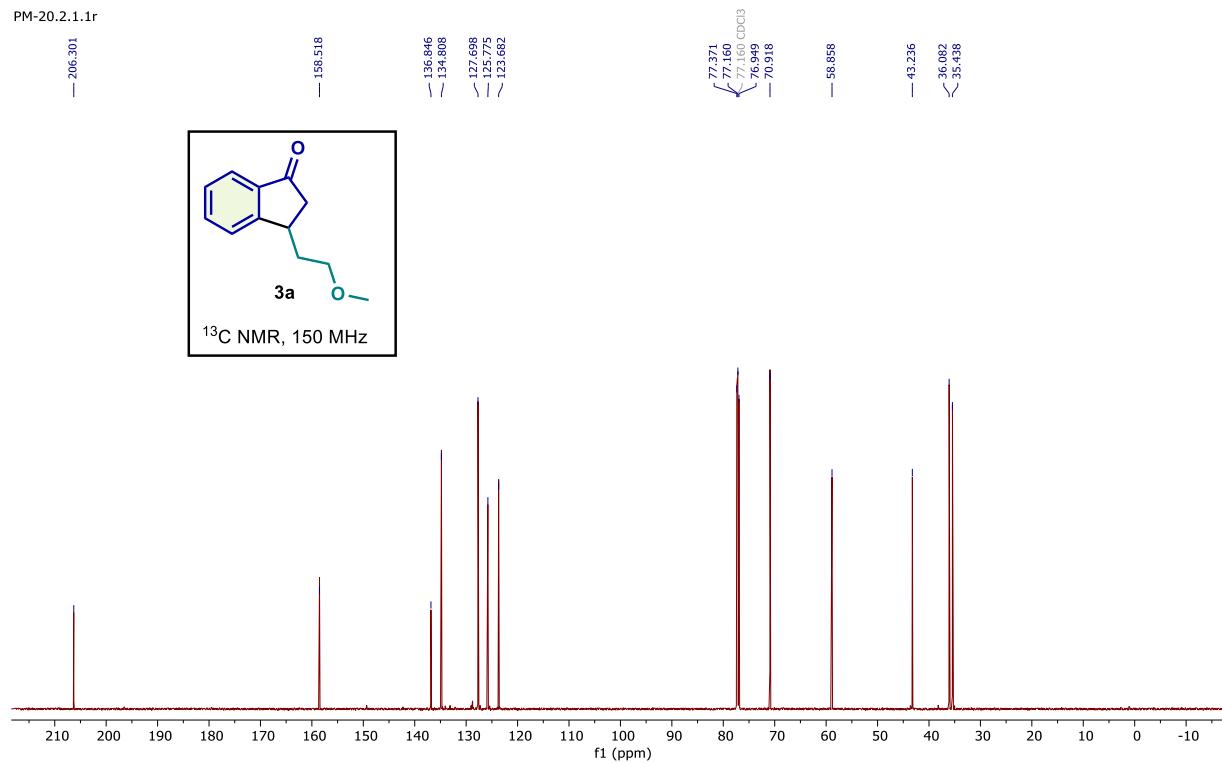

PM-26.1.1.1r

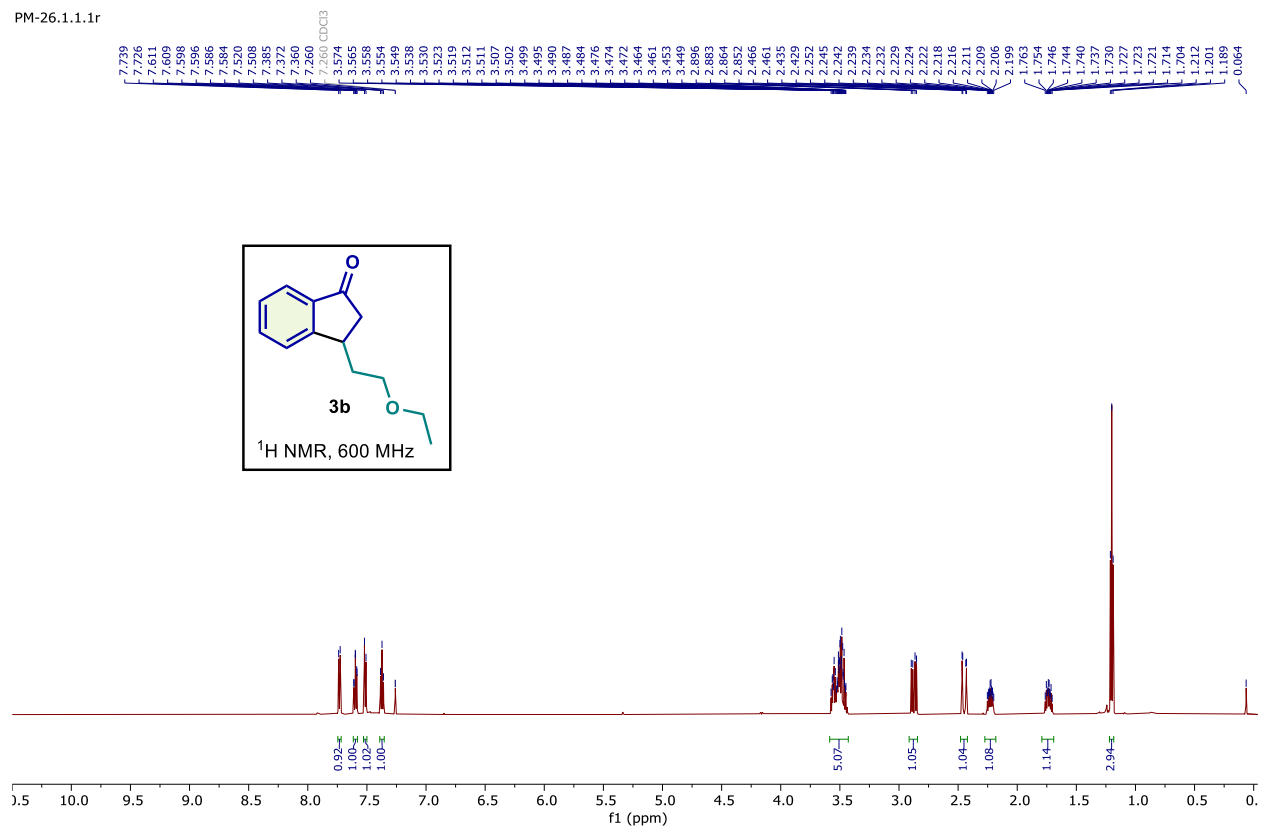

PM-26.2.1.1r

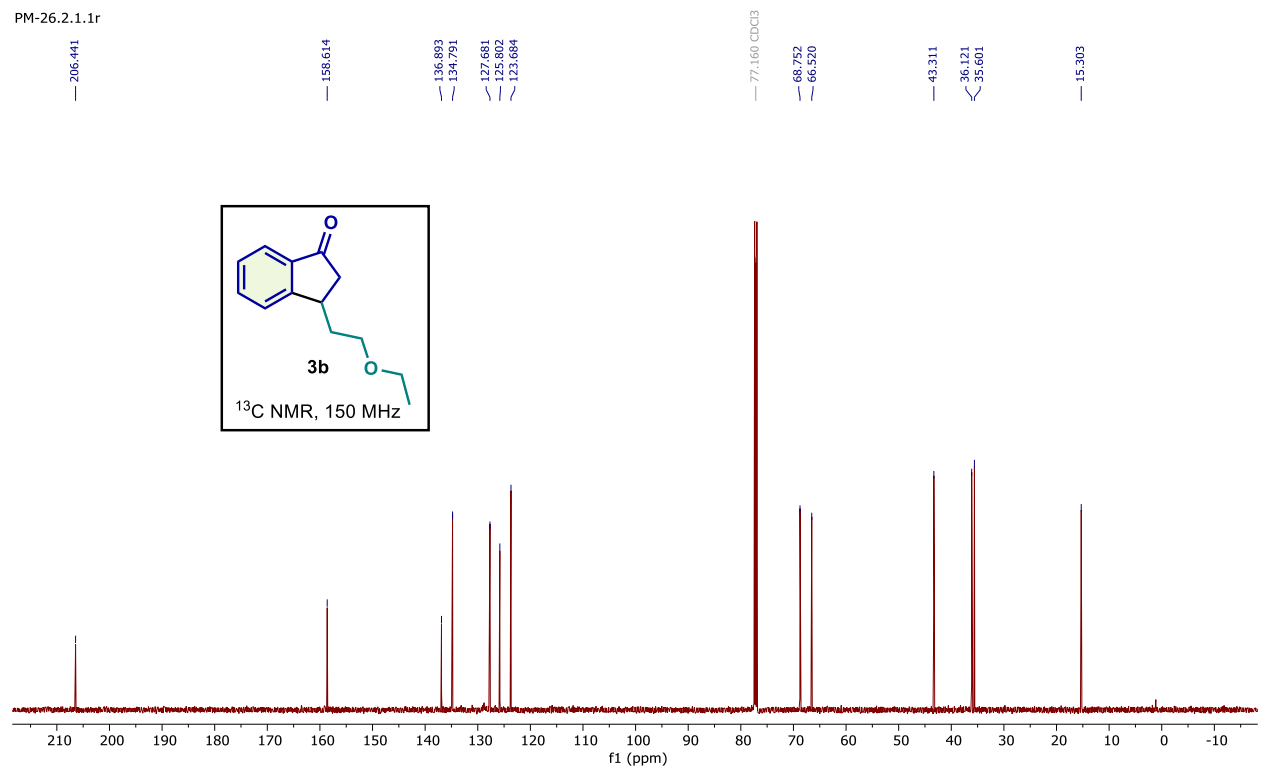

PM-01-BUTYL-1H.5.1.1r  
PM-01-BUTYL-1H

7.260  
7.244  
7.224  
7.209  
7.202  
7.195  
7.141  
7.125  
7.110  
7.098  
7.088  
7.013  
6.910  
6.895  
3.747  
3.690  
3.678  
3.666  
3.642  
3.642  
3.616  
3.069  
3.058  
3.039  
3.027  
3.024  
3.012  
2.989  
2.988  
2.983  
2.960  
2.560  
2.552  
2.523  
2.519  
2.509  
2.487  
2.449  
2.448  
2.438  
2.420  
2.405  
2.392  
2.386  
2.382  
2.367  
1.993  
1.986  
1.985  
1.948  
1.765  
1.761  
1.751  
1.740  
1.736  
1.727  
1.250  
1.247  
1.147  
1.133  
1.125  
1.118  
1.111  
1.102  
1.096  
1.089  
1.086  
1.065  
1.071  
1.060  
0.915  
0.911  
0.896  
0.880  
0.874  
0.866  
0.852  
0.855  
0.452  
0.441  
0.438  
0.427  
0.423

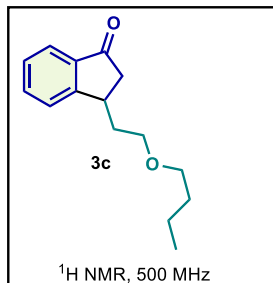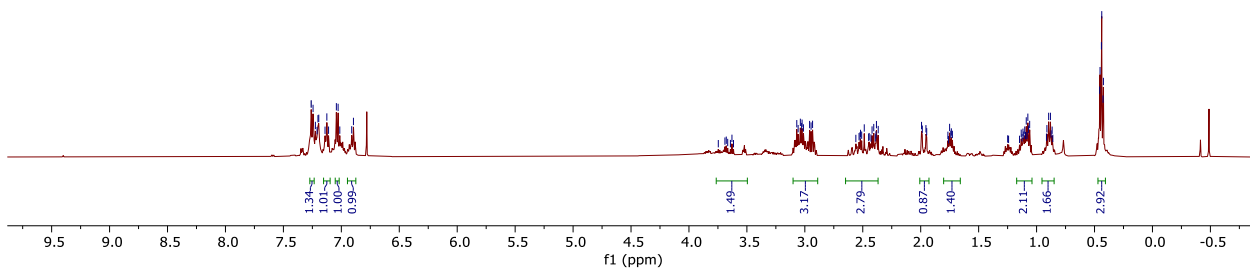

PM-01-BUTYL-13C.7.fid  
PM-01-BUTYL-13C

207.079  
159.019  
137.079  
135.148  
127.961  
126.071  
124.003  
77.160 CDCl3  
71.357  
69.251  
43.579  
36.333  
35.909  
32.140  
19.746  
14.296

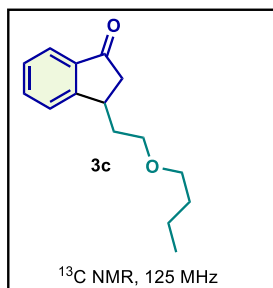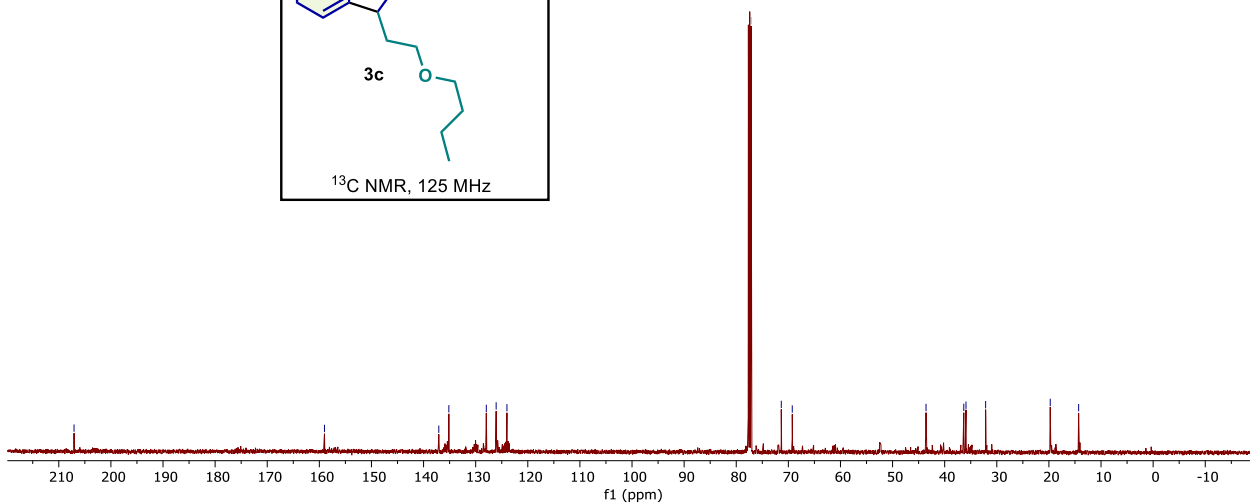



PM-ALLYL-1H.2.1.1r  
PM-ALLYL-1H

7.757  
7.742  
7.615  
7.601  
7.585  
7.514  
7.506  
7.367  
7.314  
7.299  
7.283  
7.260 CDCl<sub>3</sub>  
7.211  
7.195

3.412  
3.392  
3.369  
2.929  
2.914  
2.891  
2.876  
2.738  
2.727  
2.666  
2.439  
2.305  
2.299  
2.292  
2.286  
2.278  
2.271  
2.266  
2.262  
2.256  
1.848  
1.838  
1.828  
1.819

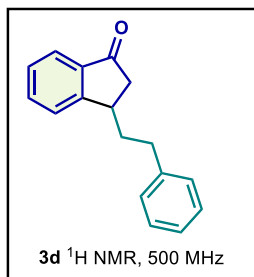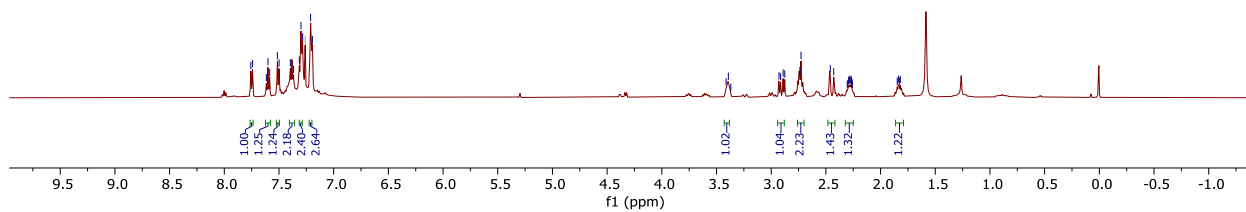

PM-ALLYL-13C.4.1.1r  
PM-ALLYL-13C

206.222  
158.691  
141.580  
136.974  
134.844  
128.680  
128.498  
127.766  
126.246  
125.691  
123.783  
77.160 CDCl<sub>3</sub>  
43.145  
37.977  
37.947  
34.070

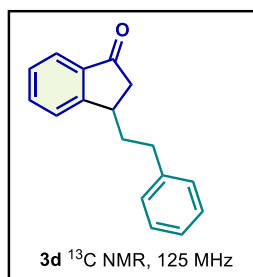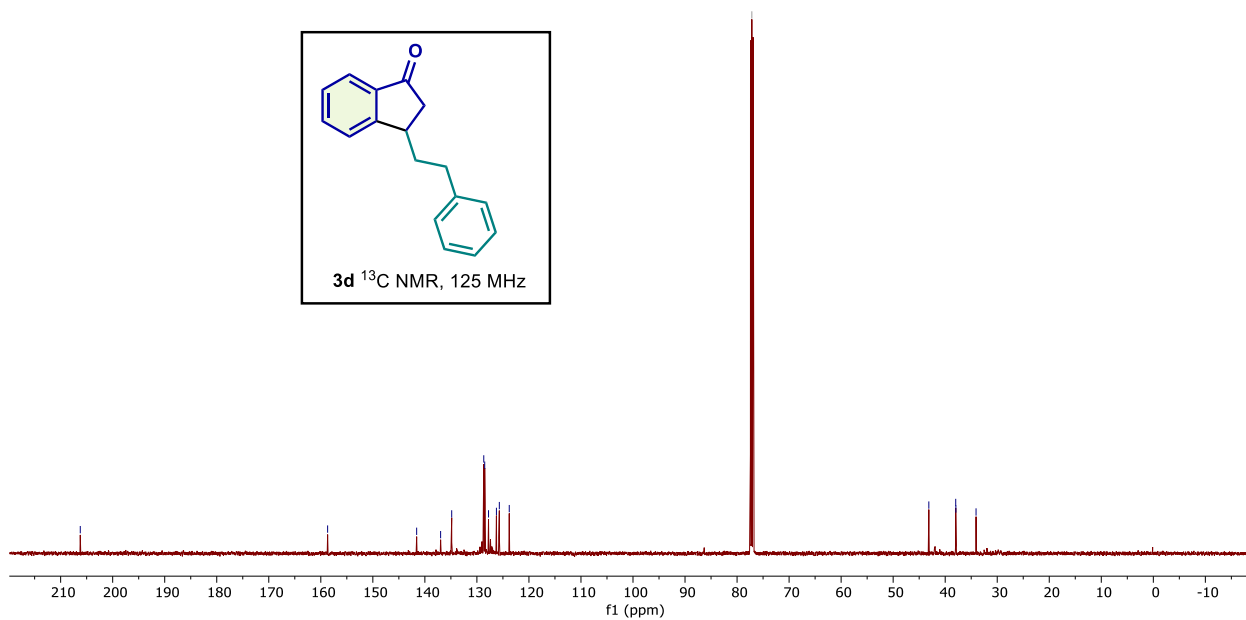

## Computational details

Using the Gaussian-09W software package<sup>S1</sup>, theoretical calculations have been carried out using the DFT method with the B3LYP/6-311++G(d,p) basis set. By changing the dihedral angles at the B3LYP/6-311++G(d,p) level of theory, a 3D potential energy scan (PES) was used to look at the most stable conformer of the title molecule. Following geometry optimizations with the DFT method, the HOMO and LUMO energy values as well as the energy gap for compounds (**3a**, **3b**, and **3c**) were calculated using the B3LYP/6-311++G(d,p) basis set. The optimum structures derived from the same level of theory were utilized to illustrate the three-dimensional Molecular Electrostatic Potentials (MEPs) of the compounds featured in the title. Additionally, based on theoretical calculations, the dipole moment, linear polarizability, and first-order hyperpolarizability were determined to demonstrate the nonlinear optical (NLO) activity of the title molecule. Docking calculations were carried out on the DNA Gyrase enzyme protein model.<sup>S2</sup> Essential hydrogen atoms, Kollman united atom type charges, and solvation parameters were added with the aid of AutoDock tools.<sup>S3</sup>

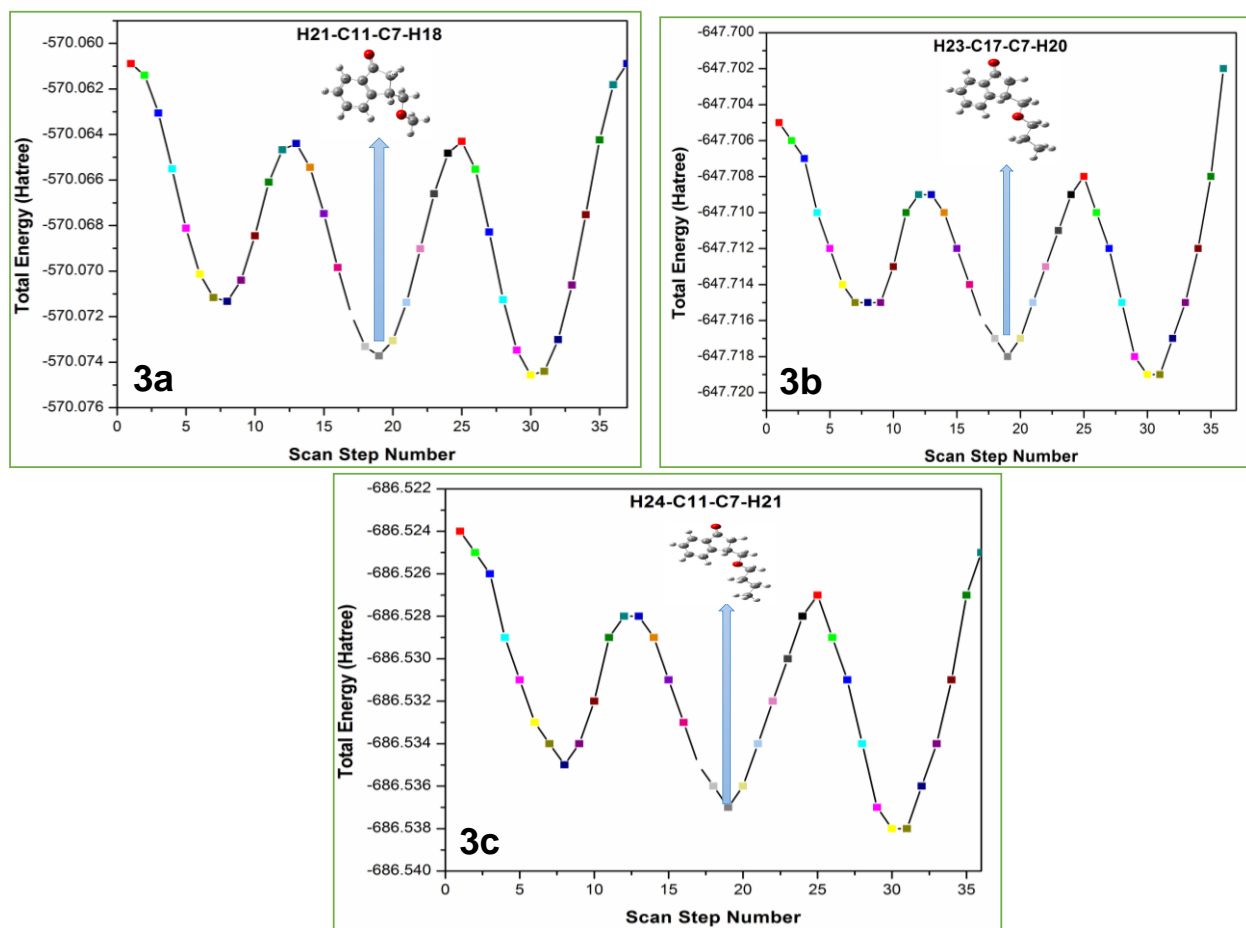

**Figure S1.** The potential energy surface (PES) scan of compounds 3a, 3b, and 3c.

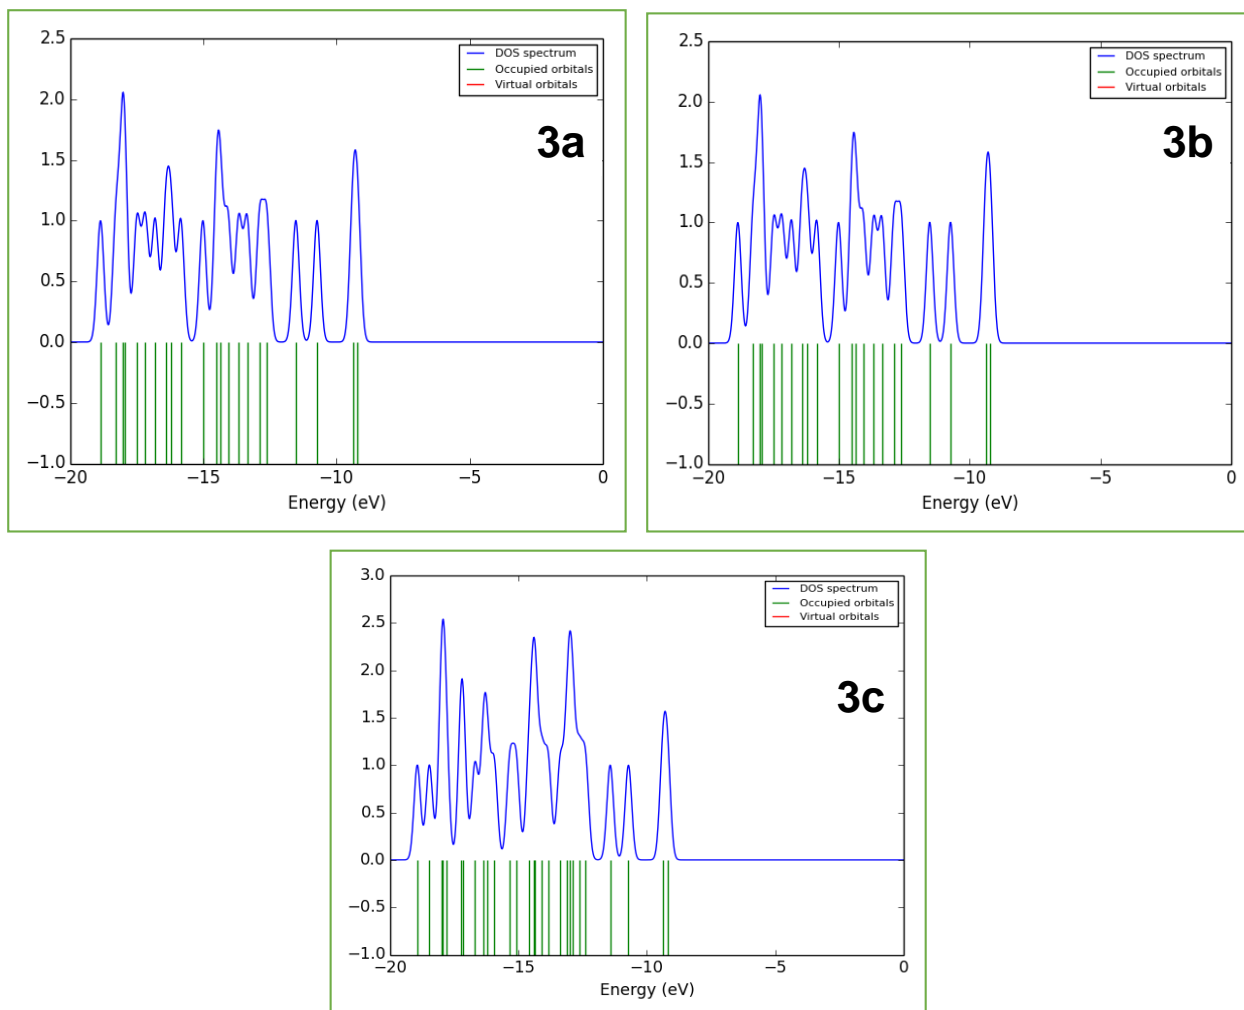

**Figure S2.** The density of states (DOS) spectra of 3a, 3b, and 3c compounds.

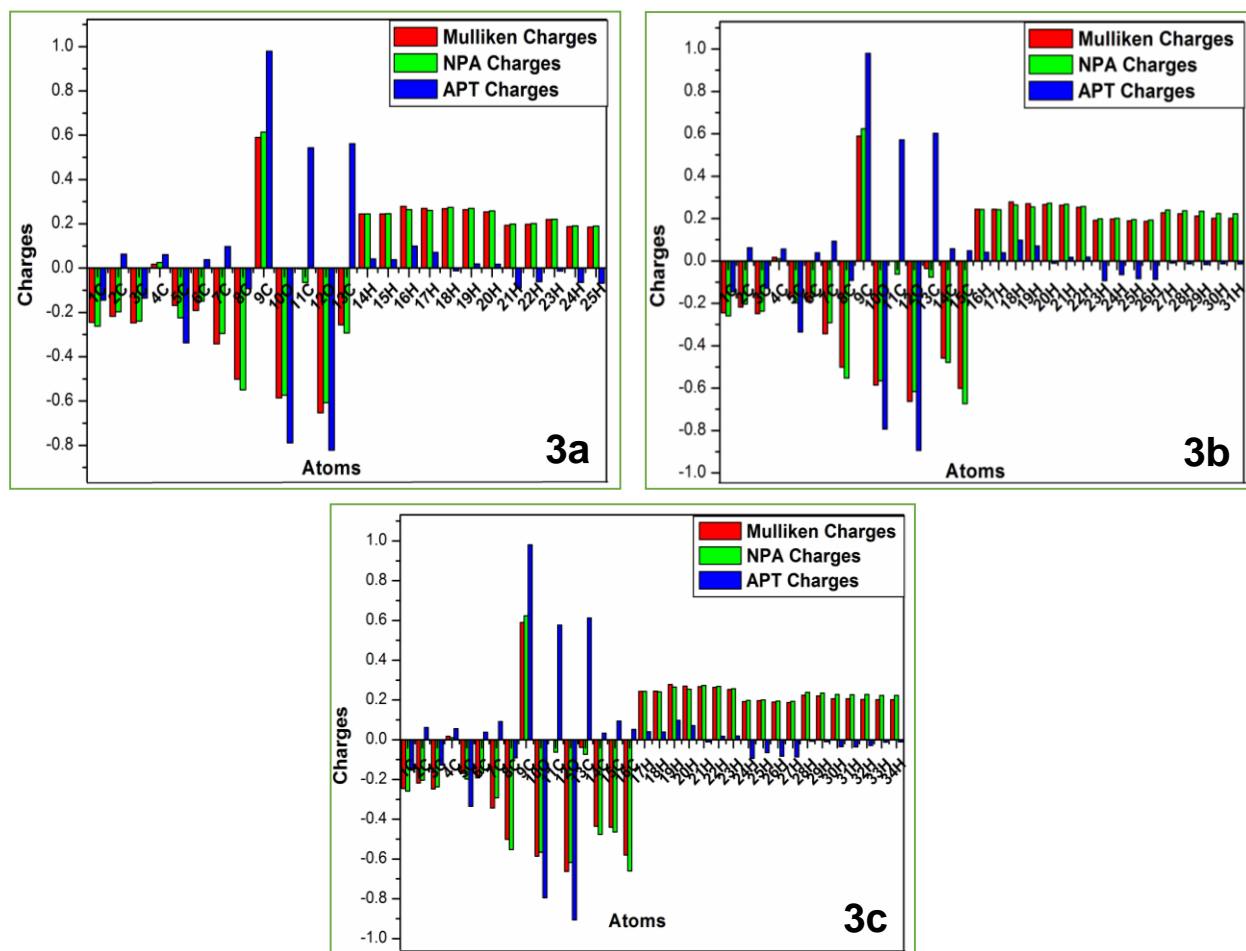

**Figure S3.** The Mulliken atomic charges of compounds, 3a, 3b, and 3c.

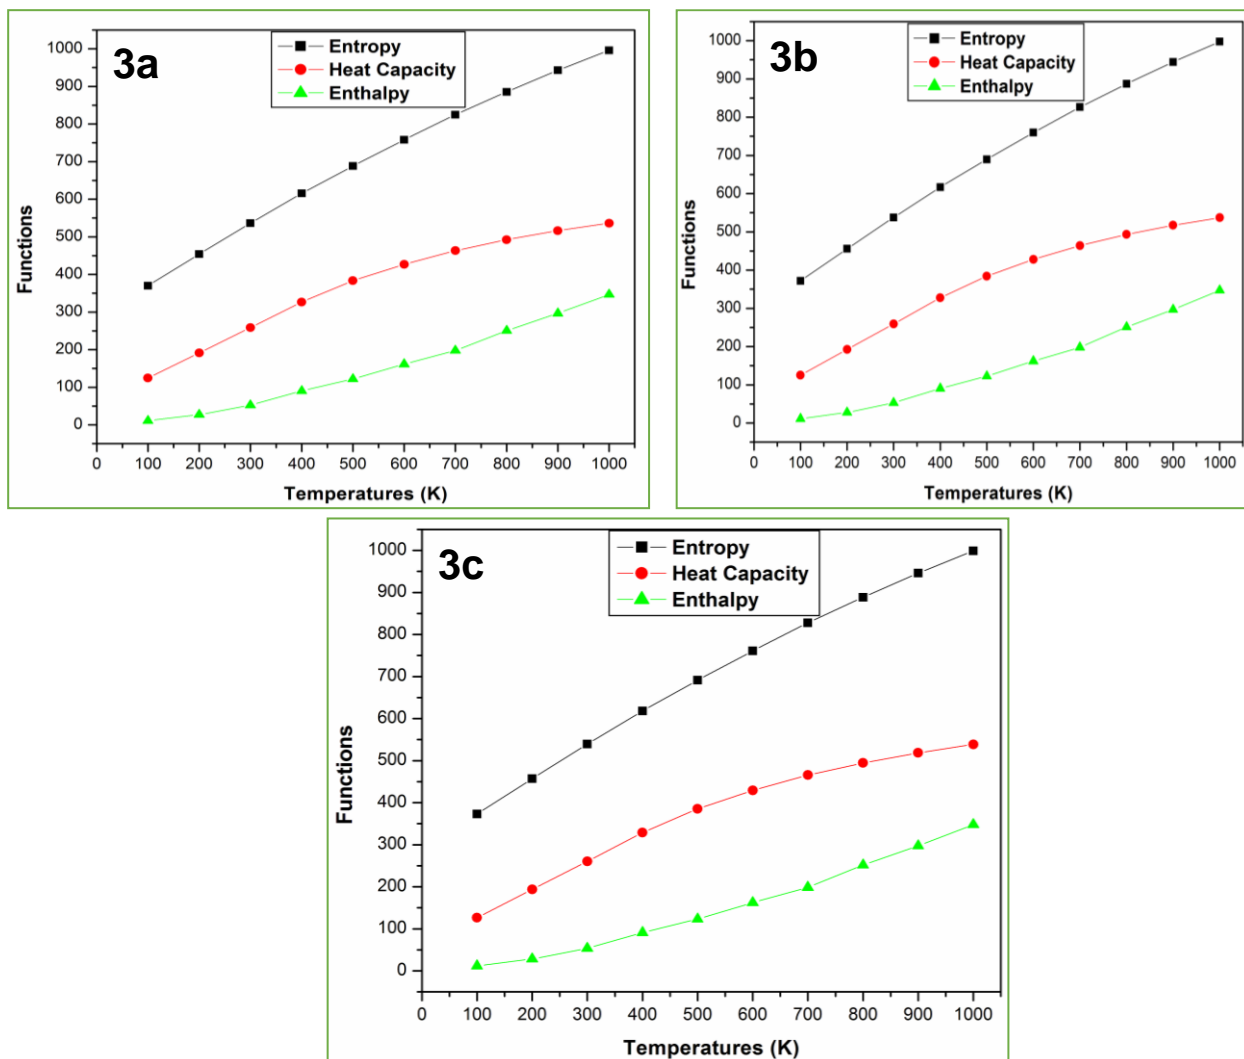

**Figure S4.** The thermodynamic properties at different temperatures of compounds 3a, 3b, and 3c.

**Table S1.** The PES scans and the total energy values of 3a, 3b, and 3c compounds.

| Compounds        |                      | 3a                     | 3b                     | 3c                     |
|------------------|----------------------|------------------------|------------------------|------------------------|
| Scan Step Number | Scan Steps at Degree | Total Energy (Hartree) | Total Energy (Hartree) | Total Energy (Hartree) |
| 1                | 10                   | -570.061               | -647.705               | -686.524               |
| 2                | 20                   | -570.061               | -647.706               | -686.525               |
| 3                | 30                   | -570.063               | -647.707               | -686.526               |
| 4                | 40                   | -570.066               | -647.710               | -686.529               |
| 5                | 50                   | -570.068               | -647.712               | -686.531               |
| 6                | 60                   | -570.070               | -647.714               | -686.533               |
| 7                | 70                   | -570.071               | -647.715               | -686.534               |
| 8                | 80                   | -570.071               | -647.715               | -686.535               |
| 9                | 90                   | -570.070               | -647.715               | -686.534               |
| 10               | 100                  | -570.068               | -647.713               | -686.532               |
| 11               | 110                  | -570.066               | -647.710               | -686.529               |
| 12               | 120                  | -570.065               | -647.709               | -686.528               |
| 13               | 130                  | -570.064               | -647.709               | -686.528               |
| 14               | 140                  | -570.065               | -647.710               | -686.529               |
| 15               | 150                  | -570.067               | -647.712               | -686.531               |
| 16               | 160                  | -570.070               | -647.714               | -686.533               |
| 17               | 170                  | -570.072               | -647.716               | -686.535               |
| 18               | 180                  | -570.073               | -647.717               | -686.536               |
| 19               | 190                  | -570.074               | -647.718               | -686.537               |
| 20               | 200                  | -570.073               | -647.717               | -686.536               |
| 21               | 210                  | -570.071               | -647.715               | -686.534               |
| 22               | 220                  | -570.069               | -647.713               | -686.532               |
| 23               | 230                  | -570.067               | -647.711               | -686.530               |
| 24               | 240                  | -570.065               | -647.709               | -686.528               |
| 25               | 250                  | -570.064               | -647.708               | -686.527               |
| 26               | 260                  | -570.066               | -647.710               | -686.529               |

|    |     |          |          |          |
|----|-----|----------|----------|----------|
| 27 | 270 | -570.068 | -647.712 | -686.531 |
| 28 | 280 | -570.071 | -647.715 | -686.534 |
| 29 | 290 | -570.073 | -647.718 | -686.537 |
| 30 | 300 | -570.075 | -647.719 | -686.538 |
| 31 | 310 | -570.074 | -647.719 | -686.538 |
| 32 | 320 | -570.073 | -647.717 | -686.536 |
| 33 | 330 | -570.071 | -647.715 | -686.534 |
| 34 | 340 | -570.068 | -647.712 | -686.531 |
| 35 | 350 | -570.064 | -647.708 | -686.527 |
| 36 | 360 | -570.062 | -647.702 | -686.525 |



**Table S2.** The optimized bond parameters of 3a, 3b, and 3c compounds.

| <b>3a</b>               |                                 |                         |                                 |
|-------------------------|---------------------------------|-------------------------|---------------------------------|
| <b>Bond Lengths (Å)</b> | <b>B3LYP/<br/>6-311++G(d,p)</b> | <b>Bond Lengths (Å)</b> | <b>B3LYP/<br/>6-311++G(d,p)</b> |
| R(1,2)                  | 1.3926                          | R(7,11)                 | 1.5254                          |
| R(1,6)                  | 1.3801                          | R(7,18)                 | 1.0821                          |
| R(1,14)                 | 1.0716                          | R(8,9)                  | 1.5325                          |
| R(2,3)                  | 1.3842                          | R(8,19)                 | 1.0821                          |
| R(2,15)                 | 1.0725                          | R(8,20)                 | 1.0851                          |
| R(3,4)                  | 1.3838                          | R(9,10)                 | 1.2099                          |
| R(3,16)                 | 1.0679                          | R(11,12)                | 1.4358                          |
| R(4,5)                  | 1.3791                          | R(11,21)                | 1.0865                          |
| R(4,7)                  | 1.5234                          | R(11,22)                | 1.0855                          |
| R(5,6)                  | 1.382                           | R(12,13)                | 1.4355                          |
| R(5,9)                  | 1.4742                          | R(13,23)                | 1.079                           |
| R(6,17)                 | 1.0719                          | R(13,24)                | 1.085                           |
| R(7,8)                  | 1.5531                          | R(13,25)                | 1.0852                          |
| <b>Bond Angles (°)</b>  | <b>B3LYP/<br/>6-311++G(d,p)</b> | <b>Bond Angles (°)</b>  | <b>B3LYP/<br/>6-311++G(d,p)</b> |
| A(2,1,6)                | 119.9385                        | A(11,7,18)              | 107.7542                        |
| A(2,1,14)               | 119.7669                        | A(7,8,9)                | 106.4416                        |
| A(6,1,14)               | 120.2946                        | A(7,8,19)               | 112.5906                        |
| A(1,2,3)                | 121.3609                        | A(7,8,20)               | 111.8645                        |
| A(1,2,15)               | 119.2684                        | A(9,8,19)               | 109.6418                        |
| A(3,2,15)               | 119.3707                        | A(9,8,20)               | 108.3167                        |
| A(2,3,4)                | 118.4279                        | A(19,8,20)              | 107.8994                        |
| A(2,3,16)               | 121.6595                        | A(5,9,8)                | 106.8861                        |
| A(4,3,16)               | 119.9018                        | A(5,9,10)               | 126.8695                        |
| A(3,4,5)                | 119.958                         | A(8,9,10)               | 126.2424                        |
| A(3,4,7)                | 128.3747                        | A(7,11,12)              | 107.0351                        |
| A(5,4,7)                | 111.6629                        | A(7,11,21)              | 110.3055                        |
| A(4,5,6)                | 121.9577                        | A(7,11,22)              | 110.0859                        |
| A(4,5,9)                | 111.0518                        | A(12,11,21)             | 110.0218                        |
| A(6,5,9)                | 126.9902                        | A(12,11,22)             | 110.7938                        |
| A(1,6,5)                | 118.3566                        | A(21,11,22)             | 108.5987                        |
| A(1,6,17)               | 121.7188                        | A(11,12,13)             | 114.872                         |

|                            |                      |                            |                      |
|----------------------------|----------------------|----------------------------|----------------------|
| A(5,6,17)                  | 119.9247             | A(12,13,23)                | 106.8307             |
| A(4,7,8)                   | 103.8276             | A(12,13,24)                | 111.2652             |
| A(4,7,11)                  | 111.9158             | A(12,13,25)                | 111.2014             |
| A(4,7,18)                  | 109.907              | A(23,13,24)                | 109.3977             |
| A(8,7,11)                  | 112.0764             | A(23,13,25)                | 109.2964             |
| A(8,7,18)                  | 111.3761             | A(24,13,25)                | 108.8079             |
|                            | <b>B3LYP/</b>        |                            | <b>B3LYP/</b>        |
| <b>Dihedral Angles (°)</b> | <b>6-311++G(d,p)</b> | <b>Dihedral Angles (°)</b> | <b>6-311++G(d,p)</b> |
| D(6,1,2,3)                 | 0.1506               | D(6,5,9,8)                 | -178.4955            |
| D(6,1,2,15)                | -179.7984            | D(6,5,9,10)                | 1.0074               |
| D(14,1,2,3)                | -179.9156            | D(4,7,8,9)                 | 3.5742               |
| D(14,1,2,15)               | 0.1354               | D(4,7,8,19)                | 123.7317             |
| D(2,1,6,5)                 | -0.1638              | D(4,7,8,20)                | -114.5564            |
| D(2,1,6,17)                | 179.838              | D(11,7,8,9)                | 124.5463             |
| D(14,1,6,5)                | 179.9028             | D(11,7,8,19)               | -115.2961            |
| D(14,1,6,17)               | -0.0954              | D(11,7,8,20)               | 6.4158               |
| D(1,2,3,4)                 | 0.0471               | D(18,7,8,9)                | -114.6487            |
| D(1,2,3,16)                | -178.7548            | D(18,7,8,19)               | 5.5088               |
| D(15,2,3,4)                | 179.996              | D(18,7,8,20)               | 127.2208             |
| D(15,2,3,16)               | 1.1941               | D(4,7,11,12)               | -67.6081             |
| D(2,3,4,5)                 | -0.2265              | D(4,7,11,21)               | 172.7096             |
| D(2,3,4,7)                 | 178.9431             | D(4,7,11,22)               | 52.8816              |
| D(16,3,4,5)                | 178.5971             | D(8,7,11,12)               | 176.2133             |
| D(16,3,4,7)                | -2.2333              | D(8,7,11,21)               | 56.5309              |
| D(3,4,5,6)                 | 0.2163               | D(8,7,11,22)               | -63.2971             |
| D(3,4,5,9)                 | -179.5953            | D(18,7,11,12)              | 53.3351              |
| D(7,4,5,6)                 | -179.0832            | D(18,7,11,21)              | -66.3473             |
| D(7,4,5,9)                 | 1.1052               | D(18,7,11,22)              | 173.8247             |
| D(3,4,7,8)                 | 177.8063             | D(7,8,9,5)                 | -3.0833              |
| D(3,4,7,11)                | 56.7263              | D(7,8,9,10)                | 177.4097             |
| D(3,4,7,18)                | -62.9612             | D(19,8,9,5)                | -125.1288            |
| D(5,4,7,8)                 | -2.9678              | D(19,8,9,10)               | 55.3643              |
| D(5,4,7,11)                | -124.0479            | D(20,8,9,5)                | 117.3612             |
| D(5,4,7,18)                | 116.2646             | D(20,8,9,10)               | -62.1457             |
| D(4,5,6,1)                 | -0.0171              | D(7,11,12,13)              | 178.0738             |
| D(4,5,6,17)                | 179.9811             | D(21,11,12,13)             | -62.0618             |
| D(9,5,6,1)                 | 179.7628             | D(22,11,12,13)             | 58.0363              |

|                         |                                 |                         |                                 |
|-------------------------|---------------------------------|-------------------------|---------------------------------|
| D(9,5,6,17)             | -0.2389                         | D(11,12,13,23)          | 179.6781                        |
| D(4,5,9,8)              | 1.3044                          | D(11,12,13,24)          | -60.9768                        |
| D(4,5,9,10)             | -179.1926                       | D(11,12,13,25)          | 60.4919                         |
| <b>3b</b>               |                                 |                         |                                 |
| <b>Bond Lengths (Å)</b> | <b>B3LYP/<br/>6-311++G(d,p)</b> | <b>Bond Lengths (Å)</b> | <b>B3LYP/<br/>6-311++G(d,p)</b> |
| R(1,2)                  | 1.3926                          | R(8,21)                 | 1.0821                          |
| R(1,6)                  | 1.3801                          | R(8,22)                 | 1.0851                          |
| R(1,16)                 | 1.0716                          | R(9,10)                 | 1.2099                          |
| R(2,3)                  | 1.3841                          | R(11,12)                | 1.4355                          |
| R(2,17)                 | 1.0725                          | R(11,23)                | 1.0864                          |
| R(3,4)                  | 1.3838                          | R(11,24)                | 1.0854                          |
| R(3,18)                 | 1.0678                          | R(12,13)                | 1.439                           |
| R(4,5)                  | 1.3791                          | R(13,14)                | 1.5258                          |
| R(4,7)                  | 1.5234                          | R(13,25)                | 1.086                           |
| R(5,6)                  | 1.382                           | R(13,26)                | 1.0864                          |
| R(5,9)                  | 1.4742                          | R(14,15)                | 1.5392                          |
| R(6,19)                 | 1.0719                          | R(14,27)                | 1.0829                          |
| R(7,8)                  | 1.5532                          | R(14,28)                | 1.0832                          |
| <b>Bond Angles (°)</b>  | <b>B3LYP/<br/>6-311++G(d,p)</b> | <b>Bond Angles (°)</b>  | <b>B3LYP/<br/>6-311++G(d,p)</b> |
| A(2,1,6)                | 119.9344                        | A(21,8,22)              | 107.8949                        |
| A(2,1,16)               | 119.7697                        | A(5,9,8)                | 106.8839                        |
| A(6,1,16)               | 120.2958                        | A(5,9,10)               | 126.8601                        |
| A(1,2,3)                | 121.3565                        | A(8,9,10)               | 126.2542                        |
| A(1,2,17)               | 119.2653                        | A(7,11,12)              | 107.1333                        |
| A(3,2,17)               | 119.3782                        | A(7,11,23)              | 110.2087                        |
| A(2,3,4)                | 118.4414                        | A(7,11,24)              | 110.0653                        |
| A(2,3,18)               | 121.6651                        | A(12,11,23)             | 110.0276                        |
| A(4,3,18)               | 119.8829                        | A(12,11,24)             | 110.8144                        |
| A(3,4,5)                | 119.9455                        | A(23,11,24)             | 108.591                         |
| A(3,4,7)                | 128.3758                        | A(11,12,13)             | 115.576                         |
| A(5,4,7)                | 111.6741                        | A(12,13,14)             | 107.3969                        |
| A(4,5,6)                | 121.9623                        | A(12,13,25)             | 110.218                         |
| A(4,5,9)                | 111.0492                        | A(12,13,26)             | 110.065                         |
| A(6,5,9)                | 126.9883                        | A(14,13,25)             | 110.56                          |
| A(1,6,5)                | 118.3593                        | A(14,13,26)             | 110.4029                        |

|                            |                      |                            |                      |
|----------------------------|----------------------|----------------------------|----------------------|
| A(1,6,19)                  | 121.7165             | A(25,13,26)                | 108.2057             |
| A(5,6,19)                  | 119.9242             | A(13,14,15)                | 111.4929             |
| A(4,7,8)                   | 103.818              | A(13,14,27)                | 108.2588             |
| A(4,7,11)                  | 111.9597             | A(13,14,28)                | 108.3819             |
| A(4,7,20)                  | 109.9042             | A(15,14,27)                | 110.5315             |
| A(8,7,11)                  | 112.0488             | A(15,14,28)                | 110.3677             |
| A(8,7,20)                  | 111.3719             | A(27,14,28)                | 107.6896             |
| A(11,7,20)                 | 107.755              | A(14,15,29)                | 110.781              |
|                            | <b>B3LYP/</b>        |                            | <b>B3LYP/</b>        |
| <b>Dihedral Angles (°)</b> | <b>6-311++G(d,p)</b> | <b>Dihedral Angles (°)</b> | <b>6-311++G(d,p)</b> |
| D(6,1,2,3)                 | 0.1393               | D(20,7,8,21)               | 5.3999               |
| D(6,1,2,17)                | -179.8108            | D(20,7,8,22)               | 127.101              |
| D(16,1,2,3)                | -179.9223            | D(4,7,11,12)               | -67.646              |
| D(16,1,2,17)               | 0.1276               | D(4,7,11,23)               | 172.6604             |
| D(2,1,6,5)                 | -0.1636              | D(4,7,11,24)               | 52.9162              |
| D(2,1,6,19)                | 179.8487             | D(8,7,11,12)               | 176.1768             |
| D(16,1,6,5)                | 179.8983             | D(8,7,11,23)               | 56.4832              |
| D(16,1,6,19)               | -0.0894              | D(8,7,11,24)               | -63.261              |
| D(1,2,3,4)                 | 0.0526               | D(20,7,11,12)              | 53.3212              |
| D(1,2,3,18)                | -178.7608            | D(20,7,11,23)              | -66.3724             |
| D(17,2,3,4)                | -179.9974            | D(20,7,11,24)              | 173.8833             |
| D(17,2,3,18)               | 1.1892               | D(7,8,9,5)                 | -2.9843              |
| D(2,3,4,5)                 | -0.2152              | D(7,8,9,10)                | 177.4849             |
| D(2,3,4,7)                 | 178.9307             | D(21,8,9,5)                | -125.0238            |
| D(18,3,4,5)                | 178.62               | D(21,8,9,10)               | 55.4454              |
| D(18,3,4,7)                | -2.2341              | D(22,8,9,5)                | 117.4711             |
| D(3,4,5,6)                 | 0.1933               | D(22,8,9,10)               | -62.0596             |
| D(3,4,5,9)                 | -179.6418            | D(7,11,12,13)              | 178.9165             |
| D(7,4,5,6)                 | -179.0862            | D(23,11,12,13)             | -61.2739             |
| D(7,4,5,9)                 | 1.0787               | D(24,11,12,13)             | 58.8316              |
| D(3,4,7,8)                 | 177.9157             | D(11,12,13,14)             | 179.3581             |
| D(3,4,7,11)                | 56.8516              | D(11,12,13,25)             | -60.1391             |
| D(3,4,7,20)                | -62.8633             | D(11,12,13,26)             | 59.1342              |
| D(5,4,7,8)                 | -2.8807              | D(12,13,14,15)             | -179.1818            |
| D(5,4,7,11)                | -123.9448            | D(12,13,14,27)             | -57.3903             |
| D(5,4,7,20)                | 116.3402             | D(12,13,14,28)             | 59.1489              |
| D(4,5,6,1)                 | -0.0001              | D(25,13,14,15)             | 60.5322              |

|                         |                                 |                         |                                 |
|-------------------------|---------------------------------|-------------------------|---------------------------------|
| D(4,5,6,19)             | 179.9878                        | D(25,13,14,27)          | -177.6763                       |
| D(9,5,6,1)              | 179.8072                        | D(25,13,14,28)          | -61.1371                        |
| D(9,5,6,19)             | -0.2049                         | D(26,13,14,15)          | -59.1726                        |
| D(4,5,9,8)              | 1.2571                          | D(26,13,14,27)          | 62.6189                         |
| D(4,5,9,10)             | -179.2159                       | D(26,13,14,28)          | 179.1581                        |
| <b>3c</b>               |                                 |                         |                                 |
| <b>Bond Lengths (Å)</b> | <b>B3LYP/<br/>6-311++G(d,p)</b> | <b>Bond Lengths (Å)</b> | <b>B3LYP/<br/>6-311++G(d,p)</b> |
| R(1,2)                  | 1.3926                          | R(9,10)                 | 1.2099                          |
| R(1,6)                  | 1.3801                          | R(11,12)                | 1.4355                          |
| R(1,17)                 | 1.0716                          | R(11,24)                | 1.0864                          |
| R(2,3)                  | 1.3841                          | R(11,25)                | 1.0854                          |
| R(2,18)                 | 1.0725                          | R(12,13)                | 1.4394                          |
| R(3,4)                  | 1.3838                          | R(13,14)                | 1.5259                          |
| R(3,19)                 | 1.0678                          | R(13,26)                | 1.086                           |
| R(4,5)                  | 1.3791                          | R(13,27)                | 1.0863                          |
| R(4,7)                  | 1.5234                          | R(14,15)                | 1.5389                          |
| R(5,6)                  | 1.382                           | R(14,28)                | 1.0837                          |
| R(5,9)                  | 1.4742                          | R(14,29)                | 1.084                           |
| R(6,20)                 | 1.0719                          | R(15,16)                | 1.5407                          |
| R(7,8)                  | 1.5532                          | R(15,30)                | 1.0859                          |
| R(7,11)                 | 1.5261                          | R(15,31)                | 1.0859                          |
| R(7,21)                 | 1.0821                          | R(16,32)                | 1.0841                          |
| <b>Bond Angles (°)</b>  | <b>B3LYP/<br/>6-311++G(d,p)</b> | <b>Bond Angles (°)</b>  | <b>B3LYP/<br/>6-311++G(d,p)</b> |
| A(2,1,6)                | 119.9342                        | A(8,9,10)               | 126.2551                        |
| A(2,1,17)               | 119.7699                        | A(7,11,12)              | 107.124                         |
| A(6,1,17)               | 120.2959                        | A(7,11,24)              | 110.2081                        |
| A(1,2,3)                | 121.3579                        | A(7,11,25)              | 110.0652                        |
| A(1,2,18)               | 119.2644                        | A(12,11,24)             | 110.0344                        |
| A(3,2,18)               | 119.3777                        | A(12,11,25)             | 110.8194                        |
| A(2,3,4)                | 118.4398                        | A(24,11,25)             | 108.5893                        |
| A(2,3,19)               | 121.6693                        | A(11,12,13)             | 115.5682                        |
| A(4,3,19)               | 119.8802                        | A(12,13,14)             | 107.377                         |
| A(3,4,5)                | 119.9461                        | A(12,13,26)             | 110.1655                        |
| A(3,4,7)                | 128.3755                        | A(12,13,27)             | 110.0115                        |
| A(5,4,7)                | 111.6737                        | A(14,13,26)             | 110.6229                        |

|                            |                      |                            |                      |
|----------------------------|----------------------|----------------------------|----------------------|
| A(4,5,6)                   | 121.9625             | A(14,13,27)                | 110.4696             |
| A(4,5,9)                   | 111.0489             | A(26,13,27)                | 108.2015             |
| A(6,5,9)                   | 126.9883             | A(13,14,15)                | 112.0399             |
| A(1,6,5)                   | 118.359              | A(13,14,28)                | 108.3094             |
| A(1,6,20)                  | 121.7168             | A(13,14,29)                | 108.4363             |
| A(5,6,20)                  | 119.9242             | A(15,14,28)                | 110.2038             |
| A(4,7,8)                   | 103.8171             | A(15,14,29)                | 110.0428             |
| A(4,7,11)                  | 111.9624             | A(28,14,29)                | 107.6834             |
| A(4,7,21)                  | 109.8994             | A(14,15,16)                | 111.8524             |
| A(8,7,11)                  | 112.0568             | A(14,15,30)                | 109.4765             |
| A(8,7,21)                  | 111.37               | A(14,15,31)                | 109.4492             |
| A(11,7,21)                 | 107.7518             | A(16,15,30)                | 109.3425             |
|                            | <b>B3LYP/</b>        |                            | <b>B3LYP/</b>        |
| <b>Dihedral Angles (°)</b> | <b>6-311++G(d,p)</b> | <b>Dihedral Angles (°)</b> | <b>6-311++G(d,p)</b> |
| D(6,1,2,3)                 | 0.1405               | D(8,7,11,12)               | 176.1809             |
| D(6,1,2,18)                | -179.81              | D(8,7,11,24)               | 56.4851              |
| D(17,1,2,3)                | -179.9219            | D(8,7,11,25)               | -63.2566             |
| D(17,1,2,18)               | 0.1276               | D(21,7,11,12)              | 53.3247              |
| D(2,1,6,5)                 | -0.1642              | D(21,7,11,24)              | -66.3711             |
| D(2,1,6,20)                | 179.8471             | D(21,7,11,25)              | 173.8872             |
| D(17,1,6,5)                | 179.8986             | D(7,8,9,5)                 | -3.0175              |
| D(17,1,6,20)               | -0.0901              | D(7,8,9,10)                | 177.4558             |
| D(1,2,3,4)                 | 0.053                | D(22,8,9,5)                | -125.0643            |
| D(1,2,3,19)                | -178.7586            | D(22,8,9,10)               | 55.4091              |
| D(18,2,3,4)                | -179.9965            | D(23,8,9,5)                | 117.4296             |
| D(18,2,3,19)               | 1.1919               | D(23,8,9,10)               | -62.0971             |
| D(2,3,4,5)                 | -0.2178              | D(7,11,12,13)              | 178.9193             |
| D(2,3,4,7)                 | 178.9237             | D(24,11,12,13)             | -61.2736             |
| D(19,3,4,5)                | 178.6156             | D(25,11,12,13)             | 58.8374              |
| D(19,3,4,7)                | -2.2429              | D(11,12,13,14)             | 179.4015             |
| D(3,4,5,6)                 | 0.1967               | D(11,12,13,26)             | -60.0621             |
| D(3,4,5,9)                 | -179.6364            | D(11,12,13,27)             | 59.1398              |
| D(7,4,5,6)                 | -179.0791            | D(12,13,14,15)             | -179.1176            |
| D(7,4,5,9)                 | 1.0878               | D(12,13,14,28)             | -57.3539             |
| D(3,4,7,8)                 | 177.8905             | D(12,13,14,29)             | 59.2343              |
| D(3,4,7,11)                | 56.8159              | D(26,13,14,15)             | 60.6359              |
| D(3,4,7,21)                | -62.8935             | D(26,13,14,28)             | -177.6004            |

|             |           |                |           |
|-------------|-----------|----------------|-----------|
| D(5,4,7,8)  | -2.9099   | D(26,13,14,29) | -61.0122  |
| D(5,4,7,11) | -123.9846 | D(27,13,14,15) | -59.1471  |
| D(5,4,7,21) | 116.306   | D(27,13,14,28) | 62.6167   |
| D(4,5,6,1)  | -0.0018   | D(27,13,14,29) | 179.2048  |
| D(4,5,6,20) | 179.987   | D(13,14,15,16) | -179.8885 |
| D(9,5,6,1)  | 179.8032  | D(13,14,15,30) | -58.5332  |
| D(4,5,9,8)  | 1.2728    | D(28,14,15,16) | 59.4399   |

**Table S3.** The NBO analysis of 3a, 3b, and 3c compounds.

| <b>3a</b>            |               |         |                  |         |                            |                   |                 |
|----------------------|---------------|---------|------------------|---------|----------------------------|-------------------|-----------------|
| Type                 | Donor NBO (i) | ED/e    | Acceptor NBO (j) | ED/e    | E <sup>(2)</sup><br>KJ/mol | E(j)-E(i)<br>a.u. | F(i, j)<br>a.u. |
| $\pi$ - $\pi^*$      | BD (2) C1-C6  | 1.66285 | BD*(2) C2-C3     | 0.3002  | 198.95                     | 0.51              | 0.141           |
|                      |               |         | BD*(2) C4-C5     | 0.37963 | 165.23                     | 0.51              | 0.129           |
| $\pi$ - $\pi^*$      | BD (2) C2-C3  | 1.6514  | BD*(2) C1-C6     | 0.28405 | 154.68                     | 0.51              | 0.125           |
|                      |               |         | BD*(2) C4-C5     | 0.37963 | 217.69                     | 0.51              | 0.147           |
| $\pi$ - $\pi^*$      | BD (2) C4-C5  | 1.63796 | BD*(2) C1-C6     | 0.28405 | 183.13                     | 0.52              | 0.137           |
|                      |               |         | BD*(2) C9-O10    | 0.13112 | 184.51                     | 0.53              | 0.145           |
| $\pi$ - $\pi^*$      | BD (2) C9-O10 | 1.97729 | BD*(2) C4-C5     | 0.37963 | 34.69                      | 0.69              | 0.074           |
|                      |               |         | BD*(1) C8-H19    | 0.00674 | 5.06                       | 1.14              | 0.033           |
| $n$ - $\sigma^*$     | LP (2) O10    | 1.91095 | BD*(1) C5-C9     | 0.05336 | 90.12                      | 1.34              | 0.153           |
|                      |               |         | BD*(1) C8-C9     | 0.055   | 130.71                     | 1.04              | 0.162           |
| $n$ - $\sigma^*$     | LP (2) O12    | 1.9384  | BD*(1) C11-H21   | 0.02293 | 37.2                       | 1.1               | 0.089           |
|                      |               |         | BD*(1) C11-H22   | 0.02376 | 35.19                      | 1.1               | 0.087           |
|                      |               |         | BD*(1) C13-H25   | 0.0188  | 36.82                      | 1.1               | 0.089           |
| $\pi^*$ - $\sigma^*$ | BD*(2) C4-C5  | 0.37963 | BD*(1) C7-C11    | 0.02076 | 9.2                        | 0.4               | 0.059           |
|                      |               |         | BD*(2) C9-O10    | 0.13112 | 1246.92                    | 0.01              | 0.115           |
| <b>3b</b>            |               |         |                  |         |                            |                   |                 |
| Type                 | Donor NBO (i) | ED/e    | Acceptor NBO (j) | ED/e    | E <sup>(2)</sup><br>KJ/mol | E(j)-E(i)<br>a.u. | F(i, j)<br>a.u. |
| $\pi$ - $\pi^*$      | BD (2) C1-C6  | 1.66302 | BD*(2) C2-C3     | 0.30026 | 198.95                     | 0.51              | 0.141           |
|                      |               |         | BD*(2) C4-C5     | 0.37925 | 165.1                      | 0.51              | 0.129           |
| $\pi$ - $\pi^*$      | BD (2) C2-C3  | 1.65174 | BD*(2) C1-C6     | 0.28409 | 154.68                     | 0.51              | 0.125           |
|                      |               |         | BD*(2) C4-C5     | 0.37925 | 217.44                     | 0.51              | 0.147           |
| $\pi$ - $\pi^*$      | BD (2) C4-C5  | 1.63789 | BD*(2) C1-C6     | 0.28409 | 183.3                      | 0.52              | 0.137           |
|                      |               |         | BD*(2) C2-C3     | 0.30026 | 143.18                     | 0.52              | 0.121           |
|                      |               |         | BD*(2) C9-O10    | 0.13105 | 184.47                     | 0.53              | 0.145           |
| $\pi$ - $\pi^*$      | BD (2) C9-O10 | 1.97729 | BD*(2) C4-C5     | 0.37925 | 34.64                      | 0.69              | 0.074           |
|                      |               |         | BD*(1) C8-H21    | 0.00674 | 5.1                        | 1.14              | 0.033           |
|                      |               |         | BD*(1) C8-H22    | 0.00791 | 4.52                       | 1.13              | 0.031           |
| $n$ - $\sigma^*$     | LP (2) O10    | 1.91097 | BD*(1) C5-C9     | 0.05337 | 90.12                      | 1.34              | 0.153           |
|                      |               |         | BD*(1) C8-C9     | 0.05498 | 130.67                     | 1.04              | 0.162           |
| $n$ - $\sigma^*$     | LP (2) O12    | 1.93806 | BD*(1) C11-H23   | 0.02287 | 37.45                      | 1.1               | 0.09            |
|                      |               |         | BD*(1) C13-H26   | 0.02421 | 38.37                      | 1.1               | 0.091           |
| $\pi^*$ - $\sigma^*$ | BD*(2) C4-C5  | 0.37925 | BD*(1) C7-C11    | 0.02055 | 9.16                       | 0.4               | 0.059           |



|                      |               |         | BD*(2) C9-O10    | 0.13105 | 1253.48                    | 0.01              | 0.115           |
|----------------------|---------------|---------|------------------|---------|----------------------------|-------------------|-----------------|
| <b>3c</b>            |               |         |                  |         |                            |                   |                 |
| Type                 | Donor NBO (i) | ED/e    | Acceptor NBO (j) | ED/e    | E <sup>(2)</sup><br>KJ/mol | E(j)-E(i)<br>a.u. | F(i, j)<br>a.u. |
| $\pi$ - $\pi^*$      | BD (2) C1-C6  | 1.67212 | BD*(2) C2-C3     | 0.29872 | 184.22                     | 0.49              | 0.132           |
|                      |               |         | BD*(2) C4-C5     | 0.36393 | 157.49                     | 0.49              | 0.122           |
| $\pi$ - $\pi^*$      | BD (2) C2-C3  | 1.66178 | BD*(2) C1-C6     | 0.28951 | 148.41                     | 0.49              | 0.119           |
|                      |               |         | BD*(2) C4-C5     | 0.36393 | 204.11                     | 0.49              | 0.138           |
| $\pi$ - $\pi^*$      | BD (2) C4-C5  | 1.651   | BD*(2) C1-C6     | 0.28951 | 177.28                     | 0.49              | 0.131           |
|                      |               |         | BD*(2) C2-C3     | 0.29872 | 139.87                     | 0.49              | 0.116           |
|                      |               |         | BD*(2) C9-O10    | 0.10404 | 127.57                     | 0.52              | 0.119           |
| $\pi$ - $\pi^*$      | BD (2) C9-O10 | 1.98365 | BD*(2) C4-C5     | 0.36393 | 22.55                      | 0.68              | 0.059           |
|                      |               |         | BD*(1) C8-H23    | 0.00757 | 5.06                       | 1.19              | 0.034           |
| n - $\sigma^*$       | LP (2) O10    | 1.90216 | BD*(1) C5-C9     | 0.05861 | 113.3                      | 1.14              | 0.158           |
|                      |               |         | BD*(1) C8-C9     | 0.05366 | 128.53                     | 1.02              | 0.16            |
| n - $\sigma^*$       | LP (2) O12    | 1.9454  | BD*(1) C11-H24   | 0.01981 | 35.1                       | 1.16              | 0.089           |
|                      |               |         | BD*(1) C13-H27   | 0.02074 | 33.56                      | 1.16              | 0.087           |
| $\pi^*$ - $\sigma^*$ | BD*(2) C4-C5  | 0.36393 | BD*(1) C7-C11    | 0.01923 | 6.36                       | 0.42              | 0.052           |
|                      |               |         | BD*(2) C9-O10    | 0.10404 | 442.71                     | 0.02              | 0.094           |

**Table S4.** The Mulliken, NPA, and APT charges of 3a, 3b, and 3c compounds.

| <b>3a</b>    |                         |                    |                    |
|--------------|-------------------------|--------------------|--------------------|
| <b>Atoms</b> | <b>Mulliken Charges</b> | <b>NPA Charges</b> | <b>APT Charges</b> |
| 1C           | -0.24505                | -0.26224           | -0.144282          |
| 2C           | -0.217886               | -0.19708           | 0.06337            |
| 3C           | -0.246705               | -0.23972           | -0.135799          |
| 4C           | 0.017115                | 0.02518            | 0.060566           |
| 5C           | -0.168757               | -0.22414           | -0.337579          |
| 6C           | -0.191667               | -0.14952           | 0.038173           |
| 7C           | -0.341738               | -0.29524           | 0.097425           |
| 8C           | -0.501631               | -0.54986           | -0.092016          |
| 9C           | 0.590127                | 0.61361            | 0.979102           |
| 10O          | -0.58558                | -0.57352           | -0.789142          |
| 11C          | -0.003099               | -0.06503           | 0.543457           |
| 12O          | -0.653737               | -0.60775           | -0.822143          |
| 13C          | -0.256353               | -0.29261           | 0.56134            |
| 14H          | 0.244043                | 0.24443            | 0.041391           |
| 15H          | 0.244949                | 0.24547            | 0.038189           |
| 16H          | 0.278795                | 0.26393            | 0.099447           |
| 17H          | 0.270034                | 0.25992            | 0.071386           |
| 18H          | 0.268225                | 0.2738             | -0.011811          |
| 19H          | 0.263699                | 0.27014            | 0.01898            |
| 20H          | 0.253148                | 0.25792            | 0.017771           |
| 21H          | 0.192822                | 0.19879            | -0.09004           |
| 22H          | 0.197583                | 0.20164            | -0.061028          |
| 23H          | 0.219555                | 0.22104            | -0.013751          |
| 24H          | 0.18745                 | 0.19119            | -0.06476           |
| 25H          | 0.184657                | 0.18964            | -0.068246          |
| <b>3b</b>    |                         |                    |                    |
| <b>Atoms</b> | <b>Mulliken Charges</b> | <b>NPA Charges</b> | <b>APT Charges</b> |
| 1C           | -0.244966               | -0.25881           | -0.145164          |
| 2C           | -0.218036               | -0.20317           | 0.062053           |
| 3C           | -0.248023               | -0.23692           | -0.129141          |
| 4C           | 0.017498                | 0.01044            | 0.056659           |
| 5C           | -0.16873                | -0.19743           | -0.33513           |
| 6C           | -0.191662               | -0.16789           | 0.038452           |

|              |                         |                    |                    |
|--------------|-------------------------|--------------------|--------------------|
| 7C           | -0.343043               | -0.29169           | 0.093233           |
| 8C           | -0.501534               | -0.55261           | -0.091751          |
| 9C           | 0.5901                  | 0.62348            | 0.97999            |
| 10O          | -0.585711               | -0.56517           | -0.793546          |
| 11C          | -0.00169                | -0.06237           | 0.571212           |
| 12O          | -0.66232                | -0.61696           | -0.894155          |
| 13C          | -0.035454               | -0.07582           | 0.602718           |
| 14C          | -0.458621               | -0.47912           | 0.05818            |
| 15C          | -0.600742               | -0.67381           | 0.048328           |
| 16H          | 0.243958                | 0.24314            | 0.04074            |
| 17H          | 0.244592                | 0.24144            | 0.038851           |
| 18H          | 0.278435                | 0.26435            | 0.097584           |
| 19H          | 0.270017                | 0.25472            | 0.071007           |
| 20H          | 0.267182                | 0.27275            | -0.011353          |
| 21H          | 0.263468                | 0.26815            | 0.017794           |
| 22H          | 0.253287                | 0.25714            | 0.019008           |
| 23H          | 0.192135                | 0.19862            | -0.092999          |
| 24H          | 0.197375                | 0.20106            | -0.064211          |
| 25H          | 0.189937                | 0.19493            | -0.083451          |
| 26H          | 0.186953                | 0.19303            | -0.086823          |
| 27H          | 0.227274                | 0.24061            | -0.010359          |
| 28H          | 0.22323                 | 0.23704            | -0.01317           |
| 29H          | 0.21264                 | 0.2342             | -0.017208          |
| 30H          | 0.201372                | 0.22343            | -0.013144          |
| 31H          | 0.201081                | 0.22326            | -0.014205          |
| <b>3c</b>    |                         |                    |                    |
| <b>Atoms</b> | <b>Mulliken Charges</b> | <b>NPA Charges</b> | <b>APT Charges</b> |
| 1C           | -0.244977               | -0.25883           | -0.145376          |
| 2C           | -0.218059               | -0.20321           | 0.061477           |
| 3C           | -0.248094               | -0.23691           | -0.127416          |
| 4C           | 0.017492                | 0.01048            | 0.055854           |
| 5C           | -0.168746               | -0.19745           | -0.334751          |
| 6C           | -0.191684               | -0.16792           | 0.038464           |
| 7C           | -0.343066               | -0.29168           | 0.091919           |
| 8C           | -0.501519               | -0.55261           | -0.091433          |
| 9C           | 0.590079                | 0.6235             | 0.980723           |
| 10O          | -0.585765               | -0.56523           | -0.795082          |

|     |           |          |           |
|-----|-----------|----------|-----------|
| 11C | -0.00176  | -0.06238 | 0.577443  |
| 12O | -0.662406 | -0.61656 | -0.906109 |
| 13C | -0.03848  | -0.07344 | 0.612439  |
| 14C | -0.434929 | -0.47576 | 0.032718  |
| 15C | -0.440358 | -0.46425 | 0.094232  |
| 16C | -0.579454 | -0.6602  | 0.051877  |
| 17H | 0.243897  | 0.24311  | 0.04058   |
| 18H | 0.244501  | 0.24139  | 0.039003  |
| 19H | 0.278677  | 0.26448  | 0.097133  |
| 20H | 0.269972  | 0.25469  | 0.070855  |
| 21H | 0.267166  | 0.27275  | -0.011078 |
| 22H | 0.263401  | 0.26811  | 0.017501  |
| 23H | 0.25328   | 0.25713  | 0.019296  |
| 24H | 0.192019  | 0.19855  | -0.093896 |
| 25H | 0.197252  | 0.20099  | -0.06512  |
| 26H | 0.190115  | 0.19502  | -0.082671 |
| 27H | 0.187137  | 0.19313  | -0.085963 |
| 28H | 0.224365  | 0.23861  | -0.007948 |
| 29H | 0.220246  | 0.23496  | -0.010447 |
| 30H | 0.20691   | 0.22741  | -0.035115 |
| 31H | 0.206618  | 0.22724  | -0.036041 |
| 32H | 0.203266  | 0.22807  | -0.029365 |
| 33H | 0.201742  | 0.22358  | -0.012286 |
| 34H | 0.201164  | 0.22323  | -0.011415 |

**Table S5.** The Thermodynamic properties at different temperatures of 3a, 3b, and 3c compounds.

| <b>3a</b> |                   |                    |                    |
|-----------|-------------------|--------------------|--------------------|
| <b>T</b>  | <b>S(J/mol.K)</b> | <b>Cp(J/mol.K)</b> | <b>ddH(kJ/mol)</b> |
| 100       | 370.21            | 124.43             | 10.87              |
| 200       | 454.17            | 191.58             | 27.22              |
| 300       | 536.29            | 258.41             | 52.47              |
| 400       | 615.32            | 326.51             | 90.12              |
| 500       | 688.21            | 383.24             | 122.18             |
| 600       | 758.02            | 426.81             | 161.37             |
| 700       | 824.71            | 463.23             | 197.68             |
| 800       | 885.51            | 492.24             | 250.68             |
| 900       | 942.72            | 516.31             | 296.45             |
| 1000      | 995.91            | 536.19             | 346.72             |
| <b>3b</b> |                   |                    |                    |
| <b>T</b>  | <b>S(J/mol.K)</b> | <b>Cp(J/mol.K)</b> | <b>ddH(kJ/mol)</b> |
| 100       | 371.71            | 125.43             | 11.37              |
| 200       | 455.67            | 192.58             | 27.72              |
| 300       | 537.79            | 259.41             | 52.97              |
| 400       | 616.82            | 327.51             | 90.62              |
| 500       | 689.71            | 384.24             | 122.68             |
| 600       | 759.52            | 427.81             | 161.87             |
| 700       | 826.21            | 464.23             | 198.18             |
| 800       | 887.01            | 493.24             | 251.18             |
| 900       | 944.22            | 517.31             | 296.95             |
| 1000      | 997.41            | 537.19             | 347.22             |
| <b>3c</b> |                   |                    |                    |
| <b>T</b>  | <b>S(J/mol.K)</b> | <b>Cp(J/mol.K)</b> | <b>ddH(kJ/mol)</b> |
| 100       | 373.16            | 126.68             | 11.93              |
| 200       | 457.12            | 193.83             | 28.28              |
| 300       | 539.24            | 260.66             | 53.53              |
| 400       | 618.27            | 328.76             | 91.18              |
| 500       | 691.16            | 385.49             | 123.24             |
| 600       | 760.97            | 429.06             | 162.43             |
| 700       | 827.66            | 465.48             | 198.74             |
| 800       | 888.46            | 494.49             | 251.74             |
| 900       | 945.67            | 518.56             | 297.51             |

|      |        |        |        |
|------|--------|--------|--------|
| 1000 | 998.86 | 538.44 | 347.78 |
|------|--------|--------|--------|

### **Anti-inflammatory activity by BSA denaturation technique**

The synthesized compound and standard diclofenac sodium were screened for anti-inflammatory activity by using the inhibition of albumin denaturation technique with minor modification. The standard drug and compound were dissolved in a minimum quantity of Dimethyl formamide (DMF) and diluted with phosphate buffer (0.2 M, pH 7.4). The final concentration of DMF in all solutions was less than 2.5%. Test Solution (2.5 mL) containing different concentrations of the drug was mixed with 1 mL of 1 mM Bovine serum albumin solution in phosphate buffer and incubated at 37 °C in an incubator for 10 min. Denaturation was induced by keeping the reaction mixture at 70 °C in a water bath for 10 min. After cooling, the turbidity was measured at 660 nm. Percentage of Inhibition of denaturation was calculated from control where no drug was added. The percentage inhibition of denaturation was calculated by using the following formula.

$$\% \text{ of Inhibition} = 100 \times [ A_c - A_t / A_c ]$$

$A_t$ : Absorbance of test

$A_c$ : Absorbance of control

### **Anti-diabetic activity $\alpha$ -amylase inhibition technique**

The antidiabetic activity of the samples was performed using the  $\alpha$ -amylase inhibition method. Briefly, Amylase (0.2%) was incubated with and without samples (in 1.5 mL) and standard for 10 min at 25 °C. This experiment was performed in 0.2 M phosphate buffer (pH 6.9). After pre-incubation, the 1% starch solution (0.5 mL) was added and the reaction mixture was incubated for 30 min at 25 °C. To stop the enzymatic reaction, DNSA reagent (0.5 mL) was added as the color reagent and then incubated in a boiling water bath for 90 min. After cooling down to room temperature, 0.5 mL of samples were diluted to 2.5 mL of distilled water and the absorbance was measured at 540 nm using a UV-visible spectrophotometer. The measured absorbance was compared with that of the control experiment. The percentage inhibition was calculated from the given formula.

$$\% \text{ of Inhibition} = 100 \times [A_c - A_t / A_c]$$

$A_t$ : Absorbance of test

$A_c$ : Absorbance of control

**Table S6.** Anti-inflammation activity of synthesized compounds.

| Concentration ( $\mu\text{g/ml}$ ) | Inhibition (%) |       |       |       |
|------------------------------------|----------------|-------|-------|-------|
|                                    | 3a             | 3b    | 3c    | std   |
| 20                                 | 28.31          | 29.92 | 31.29 | 21.32 |
| 40                                 | 36.41          | 37.41 | 42.02 | 31.05 |
| 80                                 | 49.75          | 50.50 | 55.36 | 44.39 |
| 200                                | 63.47          | 64.34 | 68.46 | 57.85 |
| 400                                | 80.92          | 83.17 | 88.41 | 76.56 |

**Table S7.** Anti-diabetic activity of synthesized compounds.

| Concentration ( $\mu\text{g/ml}$ ) | Inhibition (%) |       |       |       |
|------------------------------------|----------------|-------|-------|-------|
|                                    | 3a             | 3b    | 3c    | std   |
| 20                                 | 28.47          | 31.45 | 32.41 | 27.45 |
| 40                                 | 46.41          | 47.92 | 49.96 | 42.66 |
| 80                                 | 60.59          | 61.21 | 64.31 | 58.52 |
| 200                                | 83.21          | 84.27 | 86.90 | 81.55 |
| 400                                | 89.42          | 90.14 | 92.54 | 85.12 |

## References

- S1. Frisch, M.J., Trucks, G.W., Schlegel, H.B., Scuseria, G.E., Robb, M.A., Cheeseman, J.R., Scalmani, G., Barone, V., Mennucci, B., Petersson, G.A., Nakatsuji, H., Caricato, M., Li, X., Hratchian, H.P., Izmaylov, A.F., Bloino, J., Zheng, G., Sonnenberg, J.L., Hada, M., Ehara, M., Toyota, K., Fukuda, R., Hasegawa, J., Ishida, M., Nakajima, T., Honda, Y., Kitao, O., Nakai,

H., Vreven, T., Montgomery Jr., J.A., Peralta, J.E., Ogliaro, F., Bearpark, M., Heyd, J.J., Brothers, E., Kudin, K.N., Staroverov, V.N., Keith, T., Kobayashi, R., Normand, J., Raghavachari, K., Rendell, A., Burant, J.C., Iyengar, S.S., Tomasi, J., Cossi, M., Rega, N., Millam, J.M., Klene, M., Knox, J.E., Cross, J.B., Bakken, V., Adamo, C., Jaramillo, J., Gomperts, R., Stratmann, R.E., Yazyev, O., Austin, A.J., Cammi, R., Pomelli, C., Ochterski, J.W., Martin, R.L., Morokuma, K., Zakrzewski, V.G., Voth, G.A., Salvador, P., Dannenberg, J.J., Dapprich, S., Daniels, A.D., Farkas, O., Foresman, J.B., Ortiz, J.V., Cioslowski, J., Fox, D.J. Gaussian 09, Revision C.02, Gaussian Inc., Wallingford CT, (2010).

S2. Bikadi, Z. and Hazai, E., Application of the PM6 semi-empirical method to modeling proteins enhances docking accuracy of AutoDock. *Journal of cheminformatics*, 1, (2009), pp.1-16.

S3. Morris, G.M., Goodsell, D.S., Halliday, R.S., Huey, R., Hart, W.E., Belew, R.K. and Olson, A.J., Automated docking using a Lamarckian genetic algorithm and an empirical binding free energy function. *Journal of computational chemistry*, 19(14), (1998), pp.1639-1662.
